# Supplementary material for: Family and Individual Quality of Life in Parents of Children with Developmental Disorders and Diabetes Type 1
Source: MDPI journal article supplement (doi:10.3390/jcm11102861), 2022-05-19
Supplement: s1 [file s1]

Supplemental Table S1. Family composition, sociodemographic, health and lifestyle characteristics of parents

|                                            | CG (N=82)  | DS (N=36)  | ASD (N=36) | CP (N=20)  | DMT1 (N=43) | Overall p |
|--------------------------------------------|------------|------------|------------|------------|-------------|-----------|
| Parent's education, N (%)                  |            |            |            |            |             |           |
| high school                                | 25 (30.5)  | 27 (75.0)  | 20 (54.3)  | 14 (70.0)  | 30 (69.8)   | <0.001*   |
| bachelor degree                            | 16 (19.5)  | 5 (13.9)   | 5 (14.3)   | 2 (10.0)   | 7 (16.3)    |           |
| master degree                              | 41 (50.0)  | 5 (11.1)   | 11 (31.4)  | 4 (20.0)   | 6 (14.0)    |           |
| Working status, N (%)                      |            |            |            |            |             |           |
| employed full time                         | 72 (87.8)  | 20 (55.6)  | 16 (44.4)  | 11 (55.0)  | 32 (72.6)   | <0.001*   |
| disability benefit status                  | 0 (0.0)    | 6 (16.7)   | 11 (30.6)  | 6 (30.0)   | 5 (11.9)    |           |
| unemployed                                 | 10 (12.2)  | 10 (27.8)  | 9 (25.0)   | 3 (15.0)   | 5 (11.9)    |           |
| Monthly income, N (%)                      |            |            |            |            |             |           |
| <800 €                                     | 3 (3.8)    | 4 (11.1)   | 8 (22.2)   | 2 (10.0)   | 10 (23.8)   | <0.001*   |
| 800 –1.400 €                               | 15 (19.0)  | 17 (47.2)  | 9 (25.0)   | 13 (65.0)  | 12 (28.6)   |           |
| 1.400 – 2.000 €                            | 28 (41.8)  | 11 (30.6)  | 14 (38.9)  | 4 (20.0)   | 14 (33.3)   |           |
| >2.000 €                                   | 28 (35.4)  | 4 (11.1)   | 5 (13.9)   | 1 (5.0)    | 6 (14.3)    |           |
| Number of children, N (%)                  |            |            |            |            |             |           |
| one                                        | 13 (15.9)  | 4 (11.1)   | 8 (22.2)   | 8 (40.0)   | 6 (14.0)    | 0.001*    |
| two                                        | 56 (68.3)  | 15 (41.7)  | 20 (55.6)  | 5 (25.0)   | 28 (65.1)   |           |
| three or more                              | 13 (15.9)  | 17 (47.2)  | 8 (22.2)   | 7 (35.0)   | 9 (20.9)    |           |
| Child's age (years), M (SD)                | 6.4 (2.0)  | 7.3 (2.4)  | 7.5 (2.0)  | 8.6 (2.8)  | 9.5 (1.8)   | <0.001†   |
| Child's gender, N (%)                      |            |            |            |            |             |           |
| boys with chronic conditions               | -          | 14 (38.9)  | 33 (91.7)  | 11 (55.0)  | 29 (67.4)   | <0.001*   |
| girls with chronic conditions              | -          | 22 (61.1)  | 3 (8.3)    | 9 (45.0)   | 14 (32.6)   |           |
| typical development boys                   | 98 (58.3)  | 35 (66.0)  | 21 (60.0)  | 11 (44.0)  | 23 (51.1)   | 0.363*    |
| typical development girls                  | 70 (41.7)  | 18 (34.0)  | 14 (40.0)  | 14 (56.0)  | 22 (48.9)   |           |
| Caring for children; (hours/day), Me (IQR) |            |            |            |            |             |           |
| care for child with chronic conditions     | -          | 3.0 (2.0)  | 4.5 (3.0)  | 5.0 (2.0)  | 4.0 (3.0)   | 0.085‡    |
| care for typical development children      | 4.0 (2.0)  | 3.0 (1.0)  | 3.0 (1.0)  | 3.0 (4.0)  | 3.0 (2.0)   | <0.001‡   |
| Close friends, Me (IQR)                    | 4.0 (3.0)  | 3.0 (3.0)  | 2.0 (3.0)  | 3.0 (5.0)  | 4.0 (3.0)   | 0.002‡    |
| Association's members, N (%)               | 10 (8.0)   | 26 (74.3)  | 15 (42.9)  | 2 (10.5)   | 32 (82.1)   | <0.001*   |
| Body Mass Index, M (SD)                    | 24.6 (3.3) | 25.4 (4.7) | 24.9 (4.3) | 25.7 (4.4) | 25.2 (4.4)  | 0.807*    |
| Chronic illness, N (%)                     | 37 (45.1)  | 20 (55.6)  | 18 (50.0)  | 13 (65.0)  | 21 (48.8)   | 0.551*    |
| Health self-assessment, N (%)              |            |            |            |            |             |           |
| bad                                        | 1 (1.3)    | 1 (3.1)    | 2 (5.7)    | 3 (15.0)   | 1 (2.4)     | 0.148*    |
| good                                       | 67 (83.8)  | 24 (75.0)  | 28 (80.0)  | 14 (70.0)  | 37 (90.2)   |           |
| very good                                  | 12 (15.0)  | 7 (21.9)   | 5 (14.3)   | 3 (15.0)   | 3 (7.3)     |           |
| Mediterranean diet, M (SD)                 | 7.9 (4.3)  | 8.2 (3.8)  | 8.3 (3.6)  | 7.3 (4.1)  | 8.4 (4.3)   | 0.884†    |
| Sitting (hours/day), Me (IQR)              | 5.0 (4.3)  | 3.0 (3.3)  | 4.0 (3.8)  | 4.5 (5.8)  | 4.0 (2.8)   | 0.186‡    |
| Alcohol consumption, N (%)                 | 35 (42.7)  | 12 (33.3)  | 9 (25.0)   | 7 (35.0)   | 13 (30.2)   | 0.382*    |
| Smoking, N (%)                             | 25 (30.5)  | 11 (31.4)  | 17 (47.2)  | 4 (20.0)   | 17 (39.5)   | 0.226*    |

Note: CG-parents of children with typical development and without chronic diseases; DS-parents of children with Down syndrome; ASD-parents of children with autistic spectrum disorder; CP-parents of children with cerebral palsy; DMT-parents of children with diabetes mellitus type 1; M-mean; SD-standard deviation; Me-median; IQR-interquartile range; \*Chi-square test; †ANOVA; ‡Kruskal-Wallis test.

Supplemental Table S2. Relationship between family and individual quality of life in the overall sample including all parents (using Pearson correlation test) \*

|         | FQOL_D1 | FQOL_D2 | FQOL_D3 | FQOL_D4 | FQOL_D5 | FQOL_D6 | WHO_D1 | WHO_D2 | WHO_D3 | WHO_D4 | WHO_D5 |
|---------|---------|---------|---------|---------|---------|---------|--------|--------|--------|--------|--------|
| FQoL_D1 | 1.000   | 0.813   | 0.621   | 0.695   | 0.561   | 0.866   | 0.345  | 0.578  | 0.559  | 0.443  | 0.407  |
|         |         | <0.001  | <0.001  | <0.001  | <0.001  | <0.001  | <0.001 | <0.001 | <0.001 | <0.001 | <0.001 |
| FQoL_D2 |         | 1.000   | 0.680   | 0.740   | 0.581   | 0.894   | 0.367  | 0.520  | 0.558  | 0.436  | 0.423  |
|         |         |         | <0.001  | <0.001  | <0.001  | <0.001  | <0.001 | <0.001 | <0.001 | <0.001 | <0.001 |
| FQoL_D3 |         |         | 1.000   | 0.598   | 0.543   | 0.798   | 0.434  | 0.533  | 0.500  | 0.412  | 0.470  |
|         |         |         |         | <0.001  | <0.001  | <0.001  | <0.001 | <0.001 | <0.001 | <0.001 | <0.001 |
| FQoL_D4 |         |         |         | 1.000   | 0.600   | 0.845   | 0.481  | 0.533  | 0.539  | 0.609  | 0.519  |
|         |         |         |         |         | <0.001  | <0.001  | <0.001 | <0.001 | <0.001 | <0.001 | <0.001 |
| FQoL_D5 |         |         |         |         | 1.000   | 0.777   | 0.330  | 0.425  | 0.420  | 0.398  | 0.391  |
|         |         |         |         |         |         | <0.001  | <0.001 | <0.001 | <0.001 | <0.001 | <0.001 |
| FQoL_D6 |         |         |         |         |         | 1.000   | 0.458  | 0.600  | 0.580  | 0.531  | 0.509  |
|         |         |         |         |         |         |         | <0.001 | <0.001 | <0.001 | <0.001 | <0.001 |
| WHO_D1  |         |         |         |         |         |         | 1.000  | 0.517  | 0.419  | 0.561  | 0.577  |
|         |         |         |         |         |         |         |        | <0.001 | <0.001 | <0.001 | <0.001 |
| WHO_D2  |         |         |         |         |         |         |        | 1.000  | 0.643  | 0.605  | 0.635  |
|         |         |         |         |         |         |         |        |        | <0.001 | <0.001 | <0.001 |
| WHO_D3  |         |         |         |         |         |         |        |        | 1.000  | 0.570  | 0.540  |
|         |         |         |         |         |         |         |        |        |        | <0.001 | <0.001 |
| WHO_D4  |         |         |         |         |         |         |        |        |        | 1.000  | 0.623  |
|         |         |         |         |         |         |         |        |        |        |        | <0.001 |
| WHO_D5  |         |         |         |         |         |         |        |        |        |        | 1.000  |

Note: FQOL\_D1=family interaction domain; FQOL\_D2=parenting domain; FQOL\_D3=emotional well-being domain; FQOL\_D4=physical/material well-being domain; FQOL\_D5=disability-related support domain; FQOL\_D6=Overall FQOL (sum of scores for all domains); WHO\_D1=psychical health domain; WHO\_D2=psychological domain; WHO\_D3=Social relationship domain; WHO\_D4=environment domain; WHO\_D5=overall individual perception QoL and own health; \*Recoded Spearman's rho correlation coefficients and p values (non-parametric partial correlation was used to adjust for gender and age).
